# Supplementary material for: The Association between Liver Enzymes and Mortality Stratified by Non-Alcoholic Fatty Liver Disease: An Analysis of NHANES III
Source: MDPI journal article supplement (doi:10.3390/nu15133063), 2023-07-07
Supplement: s1 [file s1]

**Supplementary Table S1.** Baseline characteristics by hepatic steatosis and AST decile of the National Health and Nutrition Examination Survey III (1988-1994), United States.

|                                    | without hepatic steatosis |               |                  | with hepatic steatosis  |                   |                  |
|------------------------------------|---------------------------|---------------|------------------|-------------------------|-------------------|------------------|
|                                    | AST decile <sup>a</sup>   |               |                  | AST decile <sup>a</sup> |                   |                  |
|                                    | 1-3 (N=2863)              | 4-9 (N=5330)  | 10 (N=549)       | 1-3 (N=580)             | 4-9 (N=1589)      | 10 (N=474)       |
| Age (years)                        | 37 (29-48)                | 39 (29-53)    | 40 (32-54)       | 46 (33-60)              | 47 (36-60)        | 46 (33-57)       |
| Females                            | 51.9                      | 53.3          | 56.9             | 49.9                    | 41.9              | 55.3             |
| Race/Ethnicity                     |                           |               |                  |                         |                   |                  |
| Non-Hispanic white                 | 78.1                      | 75.7          | 70.9             | 77.6                    | 77.3              | 70               |
| Non-Hispanic black                 | 10.5                      | 10.8          | 12.6             | 10.3                    | 7.8               | 7.4              |
| Mexican-American                   | 4.5                       | 5.1           | 7.2              | 5.4                     | 6.9               | 12.9             |
| Other                              | 6.9                       | 8.4           | 9.3              | 6.6                     | 8                 | 9.7              |
| Education                          |                           |               |                  |                         |                   |                  |
| <12 years                          | 22.8                      | 19.8          | 24.1             | 32.2                    | 27.8              | 28.1             |
| 12 years                           | 35.3                      | 33.9          | 31.6             | 38.7                    | 34.7              | 42.1             |
| >12 years                          | 41.8                      | 46.4          | 44.3             | 29.1                    | 37.5              | 29.8             |
| No alcohol consumption             | 43                        | 41            | 47.4             | 49.6                    | 48.7              | 50               |
| Smoking                            |                           |               |                  |                         |                   |                  |
| Never                              | 39.5                      | 50.8          | 52.9             | 37.3                    | 43.8              | 47.3             |
| Former                             | 22.9                      | 23.4          | 20.3             | 32.6                    | 35.1              | 31.7             |
| Current                            | 37.6                      | 25.8          | 26.8             | 30.2                    | 21.1              | 21               |
| LTPA                               |                           |               |                  |                         |                   |                  |
| No LTPA                            | 14                        | 11.4          | 12.2             | 18.2                    | 16.6              | 14.8             |
| Irregular LTPA                     | 43.1                      | 37.6          | 32.5             | 43.7                    | 41.2              | 44               |
| Regular LTPA                       | 43                        | 51            | 55.4             | 38.1                    | 42.3              | 41.2             |
| BMI (kg/m <sup>2</sup> )           | 24.8 (22.1-28)            | 25 (22.4-28)  | 25.6 (22.8-29.1) | 28.7 (25.4-33.3)        | 29.6 (26.4-33.7)  | 30.6 (27.2-35.8) |
| Diabetes                           | 5.4                       | 3.7           | 5.1              | 17.6                    | 14                | 18.2             |
| Hypertension                       | 18.1                      | 19            | 21.2             | 35.5                    | 34.5              | 40.1             |
| Frailty                            | 1.6                       | 1.4           | 1.2              | 2.5                     | 2.2               | 1.3              |
| Serum HDL <35 mg/dL                | 12.1                      | 7.8           | 11.1             | 20.4                    | 24.8              | 25.5             |
| Serum cholesterol                  |                           |               |                  |                         |                   |                  |
| <200 mg/dL                         | 57.4                      | 50            | 49.8             | 43.1                    | 38.3              | 35.8             |
| 200-239 mg/dL                      | 29.2                      | 31.4          | 29.4             | 36.2                    | 36.3              | 29.7             |
| ≥240 mg/dL                         | 13.4                      | 18.6          | 20.8             | 20.7                    | 25.4              | 34.5             |
| Serum triglycerides                |                           |               |                  |                         |                   |                  |
| <250 mg/dL                         | 94.3                      | 92.8          | 89.7             | 82.3                    | 74.5              | 66.1             |
| 250-500 mg/dL                      | 5.1                       | 6.3           | 8.9              | 15.7                    | 21.2              | 27               |
| >500 mg/dL                         | 0.5                       | 0.8           | 1.4              | 2                       | 4.3               | 6.8              |
| AST (U/L)                          | 15 (14-16)                | 20 (18-23)    | 36 (30-43)       | 15 (14-16)              | 22 (19-25)        | 38 (34-49)       |
| ALT (U/L)                          | 11 (8-14)                 | 15 (11-20)    | 31 (22-43)       | 12 (9-17)               | 20 (15-27)        | 42 (28-62)       |
| GGT (U/L)                          | 16 (13-22)                | 19 (14-29)    | 36 (19-67)       | 22 (15-29)              | 29 (21-41)        | 53 (30-88)       |
| DRR                                | 1.4 (1.1-1.7)             | 1.4 (1.1-1.7) | 1.2 (0.9-1.6)    | 1.2 (0.9-1.5)           | 1.1 (0.9-1.4)     | 1 (0.7-1.4)      |
| Serum albumin (g/dL)               | 4.2 (4-4.4)               | 4.2 (4-4.5)   | 4.2 (4-4.5)      | 4.1 (3.9-4.4)           | 4.2 (4-4.4)       | 4.2 (4-4.4)      |
| Total bilirubin (mg/dL)            | 0.5 (0.4-0.7)             | 0.6 (0.4-0.7) | 0.6 (0.4-0.7)    | 0.5 (0.4-0.7)           | 0.6 (0.4-0.7)     | 0.6 (0.4-0.7)    |
| Platelets (G/L)                    | 268 (226-312.5)           | 263 (226-304) | 255 (226.5-319)  | 273.5 (229-321)         | 267.5 (226.5-315) | 257 (212.5-303)  |
| CRP >0.3 mg/dL                     | 24                        | 19.9          | 28.5             | 40                      | 33.9              | 44               |
| eGFR <60 ml/min/1.73m <sup>2</sup> | 7                         | 9.3           | 10.7             | 12.6                    | 12.9              | 14.5             |

Abbreviations: AST = aspartate aminotransferase, LTPA = leisure-time physical activity, BMI = body mass index, HDL = high-density lipoprotein, ALT = alanine aminotransferase, GGT = gamma glutamyltransferase, DRR = De Ritis ratio, CRP = C-reactive protein, eGFR = estimated glomerular filtration rate, IQR = interquartile range.

Continuous variables presented as median (IQR); categorical variables presented as percentage. Number N is unweighted.

<sup>a</sup>AST cut-points were 18 and 34 U/L for men and 16 and 27 U/L for women.

**Supplementary Table S2.** Baseline characteristics by hepatic steatosis and ALT decile of the National Health and Nutrition Examination Survey III (1988-1994), United States.

|                                    | without hepatic steatosis |                   |                 | with hepatic steatosis  |                   |                   |
|------------------------------------|---------------------------|-------------------|-----------------|-------------------------|-------------------|-------------------|
|                                    | ALT decile <sup>a</sup>   |                   |                 | ALT decile <sup>a</sup> |                   |                   |
|                                    | 1-3 (N=2627)              | 4-9 (N=5563)      | 10 (N=552)      | 1-3 (N=380)             | 4-9 (N=1682)      | 10 (N=581)        |
| Age (years)                        | 39 (28-54)                | 39 (30-52)        | 35 (27-46)      | 50 (32-65)              | 48 (38-60)        | 39 (33-52)        |
| Females                            | 56.6                      | 51                | 57.7            | 55.1                    | 41                | 54.5              |
| Race/Ethnicity                     |                           |                   |                 |                         |                   |                   |
| Non-Hispanic white                 | 75.5                      | 77.1              | 71.2            | 77.4                    | 77.4              | 72.2              |
| Non-Hispanic black                 | 14.3                      | 9.4               | 9.4             | 16.6                    | 8                 | 4.4               |
| Mexican-American                   | 3.5                       | 5.3               | 9.6             | 3.7                     | 6.6               | 12.4              |
| Other                              | 6.7                       | 8.3               | 9.8             | 2.3                     | 8                 | 11                |
| Education                          |                           |                   |                 |                         |                   |                   |
| <12 years                          | 23.2                      | 19.9              | 22.7            | 38.4                    | 29.1              | 22.5              |
| 12 years                           | 34.6                      | 34.2              | 32.5            | 38.8                    | 35.5              | 39.2              |
| >12 years                          | 42.2                      | 45.8              | 44.8            | 22.7                    | 35.4              | 38.3              |
| No alcohol consumption             | 43.3                      | 41.2              | 44.6            | 53.1                    | 47                | 53.1              |
| Smoking                            |                           |                   |                 |                         |                   |                   |
| Never                              | 42.3                      | 48.7              | 52.8            | 36.4                    | 41.6              | 50.4              |
| Former                             | 22                        | 24                | 16.9            | 29.8                    | 35.6              | 31.7              |
| Current                            | 35.6                      | 27.3              | 30.3            | 33.8                    | 22.8              | 17.9              |
| LTPA                               |                           |                   |                 |                         |                   |                   |
| No LTPA                            | 14.7                      | 11.3              | 12              | 18.2                    | 16.1              | 17.3              |
| Irregular LTPA                     | 38.8                      | 38.9              | 45.1            | 43.9                    | 41.7              | 42.5              |
| Regular LTPA                       | 46.5                      | 49.9              | 42.9            | 37.9                    | 42.2              | 40.2              |
| BMI (kg/m <sup>2</sup> )           | 23.8 (21.5-26.8)          | 25.3 (22.7-28.4)  | 26 (23.6-29.5)  | 25.9 (22-30.3)          | 29.5 (26.4-33.7)  | 31.2 (27.8-36.2)  |
| Diabetes                           | 3.6                       | 4.4               | 8.1             | 12.2                    | 14.4              | 20.4              |
| Hypertension                       | 17.9                      | 19.2              | 19              | 30.8                    | 36.4              | 36.1              |
| Frailty                            | 2.1                       | 1.3               | 0.8             | 1.8                     | 1.6               | 3.9               |
| Serum HDL <35 mg/dL                | 8.6                       | 9.6               | 11.5            | 12.2                    | 24.4              | 29.2              |
| Serum cholesterol                  |                           |                   |                 |                         |                   |                   |
| <200 mg/dL                         | 58                        | 50.6              | 46.1            | 47.1                    | 38                | 37.3              |
| 200-239 mg/dL                      | 28                        | 31.3              | 34.9            | 32.9                    | 36.4              | 33                |
| ≥240 mg/dL                         | 14                        | 18.1              | 18.9            | 20                      | 25.6              | 29.8              |
| Serum triglycerides                |                           |                   |                 |                         |                   |                   |
| <250 mg/dL                         | 95.9                      | 92.4              | 88.1            | 88.1                    | 75.3              | 66.1              |
| 250-500 mg/dL                      | 3.9                       | 6.6               | 10.9            | 10.1                    | 20.4              | 28.8              |
| >500 mg/dL                         | 0.2                       | 1                 | 1               | 1.8                     | 4.3               | 5.1               |
| AST (U/L)                          | 16 (14-18)                | 19 (17-22)        | 29 (25-38)      | 16 (14-18)              | 20 (18-24)        | 32 (26-43)        |
| ALT (U/L)                          | 9 (7-10)                  | 15 (13-20)        | 38 (30-47)      | 9 (7-10)                | 19 (15-23)        | 40 (30-54)        |
| GGT (U/L)                          | 15 (12-20)                | 20 (14-29)        | 36 (22-68)      | 17 (12-22)              | 27 (20-38)        | 43 (30-69)        |
| DRR                                | 1.9 (1.6-2.2)             | 1.2 (1-1.5)       | 0.8 (0.6-1)     | 1.9 (1.6-2.2)           | 1.1 (0.9-1.4)     | 0.8 (0.7-1)       |
| Serum albumin (g/dL)               | 4.2 (4-4.4)               | 4.2 (4-4.4)       | 4.2 (3.9-4.4)   | 4.1 (3.9-4.4)           | 4.2 (4-4.4)       | 4.2 (4-4.4)       |
| Total bilirubin (mg/dL)            | 0.5 (0.4-0.7)             | 0.6 (0.4-0.7)     | 0.5 (0.4-0.7)   | 0.4 (0.4-0.6)           | 0.6 (0.4-0.7)     | 0.6 (0.4-0.7)     |
| Platelets (G/L)                    | 265 (225.5-307.5)         | 263.5 (225.5-306) | 262 (231.5-332) | 270 (231-340)           | 265.5 (224.5-313) | 263.5 (221-316.5) |
| CRP >0.3 mg/dL                     | 23.3                      | 20.6              | 27.2            | 39.1                    | 34.5              | 42.4              |
| eGFR <60 ml/min/1.73m <sup>2</sup> | 11                        | 7.9               | 4.2             | 14                      | 13.9              | 10.3              |

Abbreviations: ALT = alanine aminotransferase, LTPA = leisure-time physical activity, BMI = body mass index, HDL = high-density lipoprotein, AST = aspartate aminotransferase, GGT = gamma glutamyltransferase, DRR = De Ritis ratio, CRP = C-reactive protein, eGFR = estimated glomerular filtration rate, IQR = interquartile range.

Continuous variables presented as median (IQR); categorical variables presented as percentage. Number N is unweighted.

<sup>a</sup>ALT cut-points were 13 and 36 U/L for men and 9 and 24 U/L for women.

**Supplementary Table S3.** Baseline characteristics by hepatic steatosis and GGT decile of the National Health and Nutrition Examination Survey III (1988-1994), United States.

|                                    | without hepatic steatosis |                     | with hepatic steatosis  |                   |
|------------------------------------|---------------------------|---------------------|-------------------------|-------------------|
|                                    | GGT decile <sup>a</sup>   |                     | GGT decile <sup>a</sup> |                   |
|                                    | 1-8 (N=5707)              | 9-10 (N=1097)       | 1-8 (N=1398)            | 9-10 (N=677)      |
| Age (years)                        | 38 (29-51)                | 42 (33-56)          | 45 (33-59)              | 48 (37-58)        |
| Females                            | 52.5                      | 53.1                | 42.6                    | 52.2              |
| Race/Ethnicity                     |                           |                     |                         |                   |
| Non-Hispanic white                 | 77.3                      | 63.1                | 78                      | 66.4              |
| Non-Hispanic black                 | 9.8                       | 21.6                | 8.1                     | 11.4              |
| Mexican-American                   | 4.4                       | 5.9                 | 6.4                     | 9.5               |
| Other                              | 8.5                       | 9.5                 | 7.5                     | 12.6              |
| Education                          |                           |                     |                         |                   |
| <12 years                          | 19.9                      | 27.1                | 25.1                    | 33.7              |
| 12 years                           | 33.1                      | 35.5                | 39.2                    | 32.9              |
| >12 years                          | 47                        | 37.4                | 35.7                    | 33.4              |
| No alcohol consumption             | 42.1                      | 40.1                | 49.5                    | 49                |
| Smoking                            |                           |                     |                         |                   |
| Never                              | 48.8                      | 42.5                | 42.1                    | 44.4              |
| Former                             | 22.4                      | 23.8                | 33.6                    | 34.7              |
| Current                            | 28.8                      | 33.7                | 24.2                    | 20.9              |
| LTPA                               |                           |                     |                         |                   |
| No LTPA                            | 11.8                      | 18.4                | 15.3                    | 20.8              |
| Irregular LTPA                     | 38.9                      | 37.6                | 41                      | 41.2              |
| Regular LTPA                       | 49.2                      | 44                  | 43.8                    | 38.1              |
| BMI (kg/m <sup>2</sup> )           | 24.8 (22.2-27.9)          | 26.5 (23.7-30.5)    | 29.1 (25.8-33.3)        | 30.7 (27.2-35.7)  |
| Diabetes                           | 3.5                       | 10                  | 12.5                    | 22.1              |
| Hypertension                       | 17                        | 30.4                | 33.6                    | 37.4              |
| Frailty                            | 1                         | 3.8                 | 1.7                     | 2.5               |
| Serum HDL <35 mg/dL                | 9.4                       | 9.7                 | 25.3                    | 24                |
| Serum cholesterol                  |                           |                     |                         |                   |
| <200 mg/dL                         | 54.9                      | 39.9                | 42.6                    | 33                |
| 200-239 mg/dL                      | 29.6                      | 36.1                | 36.5                    | 30.6              |
| ≥240 mg/dL                         | 15.5                      | 24                  | 20.9                    | 36.4              |
| Serum triglycerides                |                           |                     |                         |                   |
| <250 mg/dL                         | 94.3                      | 86.1                | 79.2                    | 67.2              |
| 250-500 mg/dL                      | 5                         | 12.4                | 17.7                    | 26.1              |
| >500 mg/dL                         | 0.6                       | 1.5                 | 3.1                     | 6.6               |
| AST (U/L)                          | 18 (16-21)                | 21 (18-28)          | 20 (17-25)              | 26 (20-37)        |
| ALT (U/L)                          | 13 (10-18)                | 19 (14-28)          | 18 (13-26)              | 28 (19-42)        |
| GGT (U/L)                          | 17 (13-23)                | 54 (42-77)          | 22 (18-29)              | 59 (46-86)        |
| DRR                                | 1.4 (1.1-1.7)             | 1.2 (0.9-1.4)       | 1.1 (0.9-1.5)           | 1 (0.7-1.2)       |
| Serum albumin (g/dL)               | 4.2 (4-4.4)               | 4.1 (3.9-4.3)       | 4.2 (4-4.4)             | 4.1 (3.9-4.4)     |
| Total bilirubin (mg/dL)            | 0.5 (0.4-0.7)             | 0.5 (0.4-0.7)       | 0.6 (0.4-0.7)           | 0.5 (0.4-0.7)     |
| Platelets (G/L)                    | 261.5 (222-302)           | 268.5 (228.5-324.5) | 258 (222.5-307.5)       | 266 (219.5-316.5) |
| CRP >0.3 mg/dL                     | 21.6                      | 40.8                | 33.6                    | 54                |
| eGFR <60 ml/min/1.73m <sup>2</sup> | 8.4                       | 11.5                | 11.7                    | 14.4              |

Abbreviations: GGT = gamma glutamyltransferase, LTPA = leisure-time physical activity, BMI = body mass index, HDL = high-density lipoprotein, AST = aspartate aminotransferase, ALT = alanine aminotransferase, DRR = De Ritis ratio, CRP = C-reactive protein, eGFR = estimated glomerular filtration rate, IQR = interquartile range.

Continuous variables presented as median (IQR); categorical variables presented as percentage. Number N is unweighted.

<sup>a</sup>GGT cut-points were 46 U/L for men and 31 U/L for women.

**Supplementary Table S4.** Baseline characteristics by hepatic steatosis and DRR tertile of the National Health and Nutrition Examination Survey III (1988-1994), United States.

|                                    | without hepatic steatosis |                       |                       | with hepatic steatosis   |                      |                      |
|------------------------------------|---------------------------|-----------------------|-----------------------|--------------------------|----------------------|----------------------|
|                                    | DRR tertile <sup>a</sup>  |                       |                       | DRR tertile <sup>a</sup> |                      |                      |
|                                    | Tertile 1<br>(N=2786)     | Tertile 2<br>(N=3210) | Tertile 3<br>(N=2746) | Tertile 1<br>(N=1444)    | Tertile 2<br>(N=720) | Tertile 3<br>(N=479) |
| Age (years)                        | 37 (29-47)                | 40 (30-52)            | 40 (29-57)            | 44 (34-54)               | 53 (40-64)           | 54 (36-66)           |
| Females                            | 36.1                      | 57.2                  | 67.2                  | 36.8                     | 57                   | 63.5                 |
| Race/Ethnicity                     |                           |                       |                       |                          |                      |                      |
| Non-Hispanic white                 | 76.1                      | 77.9                  | 74.5                  | 75.7                     | 78.6                 | 74.8                 |
| Non-Hispanic black                 | 7.6                       | 10.4                  | 15                    | 5                        | 10.8                 | 17                   |
| Mexican-American                   | 6.6                       | 4.9                   | 3.3                   | 8.7                      | 6.6                  | 4.5                  |
| Other                              | 9.7                       | 6.8                   | 7.2                   | 10.6                     | 4                    | 3.7                  |
| Education                          |                           |                       |                       |                          |                      |                      |
| <12 years                          | 19.5                      | 21.7                  | 22                    | 26                       | 32.7                 | 33.5                 |
| 12 years                           | 33.7                      | 33.8                  | 35.5                  | 35.8                     | 38.8                 | 37.5                 |
| >12 years                          | 46.8                      | 44.5                  | 42.5                  | 38.2                     | 28.5                 | 29                   |
| No alcohol consumption             | 40.1                      | 42.9                  | 43.1                  | 47.4                     | 48.7                 | 56.4                 |
| Smoking                            |                           |                       |                       |                          |                      |                      |
| Never                              | 45.9                      | 47.9                  | 47.4                  | 42.7                     | 43.5                 | 43                   |
| Former                             | 22.8                      | 24.8                  | 21.2                  | 35.6                     | 32.8                 | 29.5                 |
| Current                            | 31.3                      | 27.3                  | 31.4                  | 21.7                     | 23.7                 | 27.5                 |
| LTPA                               |                           |                       |                       |                          |                      |                      |
| No LTPA                            | 11                        | 12.3                  | 13.9                  | 17.1                     | 14.9                 | 17.3                 |
| Irregular LTPA                     | 42.5                      | 37.8                  | 37                    | 42.9                     | 43                   | 38.3                 |
| Regular LTPA                       | 46.5                      | 49.9                  | 49.1                  | 40                       | 42                   | 44.5                 |
| BMI (kg/m <sup>2</sup> )           | 26.1 (23.7-29.3)          | 24.9 (22.3-28)        | 23.6 (21.3-26.5)      | 30.6 (27.3-34.5)         | 28.4 (25.3-32.5)     | 26.8 (22.8-32.2)     |
| Diabetes                           | 6.4                       | 3.5                   | 3.2                   | 17.2                     | 13.4                 | 11.7                 |
| Hypertension                       | 18.6                      | 18.8                  | 19.1                  | 34.1                     | 40                   | 34.8                 |
| Frailty                            | 1                         | 1.2                   | 2.3                   | 2.4                      | 1.7                  | 1.8                  |
| Serum HDL <35 mg/dL                | 13.9                      | 8.5                   | 5.5                   | 29.6                     | 15.5                 | 14.8                 |
| Serum cholesterol                  |                           |                       |                       |                          |                      |                      |
| <200 mg/dL                         | 48.7                      | 53.1                  | 56.2                  | 38.8                     | 38.9                 | 39.8                 |
| 200-239 mg/dL                      | 33                        | 30.2                  | 28.1                  | 35.6                     | 34.3                 | 34.9                 |
| ≥240 mg/dL                         | 18.3                      | 16.7                  | 15.7                  | 25.6                     | 26.8                 | 25.3                 |
| Serum triglycerides                |                           |                       |                       |                          |                      |                      |
| <250 mg/dL                         | 90.4                      | 93.4                  | 96.2                  | 71                       | 79.2                 | 83.1                 |
| 250-500 mg/dL                      | 8.6                       | 5.8                   | 3.4                   | 24.1                     | 17.6                 | 13.7                 |
| >500 mg/dL                         | 1                         | 0.8                   | 0.4                   | 4.8                      | 3.2                  | 3.2                  |
| AST (U/L)                          | 19 (16-24)                | 18 (16-21)            | 18 (15-21)            | 22 (19-29)               | 20 (17-24)           | 19 (17-26)           |
| ALT (U/L)                          | 20 (16-26)                | 13 (11-15)            | 9 (7-11)              | 26 (19-35)               | 14 (12-18)           | 10 (8-14)            |
| GGT (U/L)                          | 25 (17-35)                | 17 (13-25)            | 15 (12-20)            | 33 (24-49)               | 22 (17-33)           | 20 (14-32)           |
| DRR                                | 1 (0.8-1.1)               | 1.4 (1.3-1.5)         | 2 (1.8-2.3)           | 0.9 (0.7-1)              | 1.4 (1.3-1.5)        | 1.9 (1.8-2.2)        |
| Serum albumin (g/dL)               | 4.2 (4-4.5)               | 4.2 (4-4.4)           | 4.2 (4-4.4)           | 4.2 (4-4.4)              | 4.2 (3.9-4.4)        | 4.1 (3.9-4.4)        |
| Total bilirubin (mg/dL)            | 0.6 (0.4-0.7)             | 0.5 (0.4-0.7)         | 0.5 (0.4-0.7)         | 0.6 (0.4-0.7)            | 0.5 (0.4-0.7)        | 0.5 (0.4-0.7)        |
| Platelets (G/L)                    | 264.5 (227-306)           | 262.5 (224-310.5)     | 265.5 (227.5-306)     | 265.5 (223-315)          | 264.5 (226-306.5)    | 268.5 (227.5-340)    |
| CRP >0.3 mg/dL                     | 20.6                      | 22                    | 22.7                  | 36.2                     | 34.3                 | 43                   |
| eGFR <60 ml/min/1.73m <sup>2</sup> | 4.8                       | 8.4                   | 13.2                  | 9.2                      | 20.1                 | 17.4                 |

Abbreviations: DRR = De Ritis ratio, LTPA = leisure-time physical activity, BMI = body mass index, HDL = high-density lipoprotein, AST = aspartate aminotransferase, ALT = alanine aminotransferase, GGT = gamma glutamyltransferase, CRP = C-reactive protein, eGFR = estimated glomerular filtration rate, IQR = interquartile range.

Continuous variables presented as median (IQR); categorical variables presented as percentage. Number N is unweighted.

<sup>a</sup>DRR cut-points were 1.2 and 1.64.

### all-cause mortality

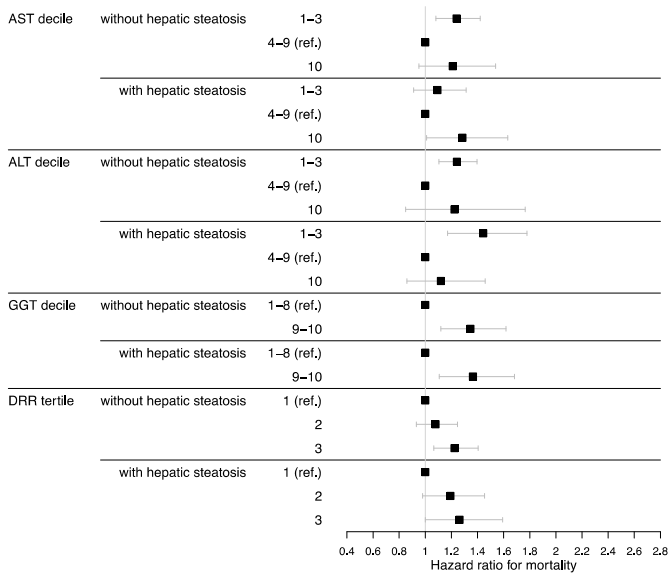

(a)

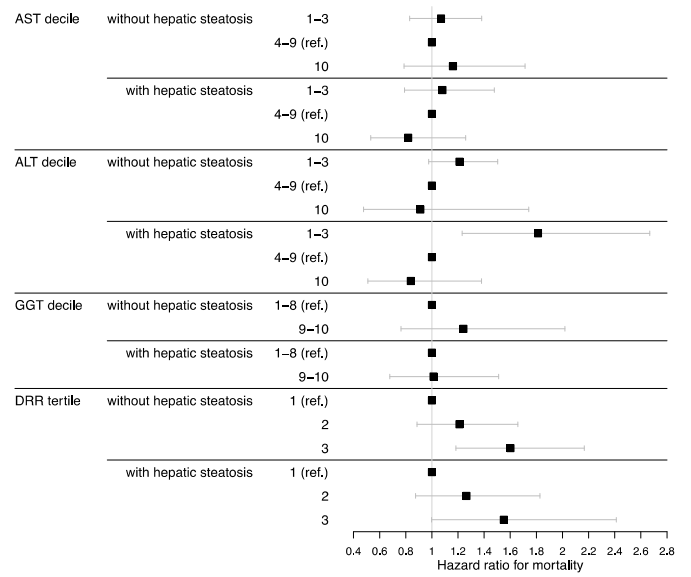

(b)

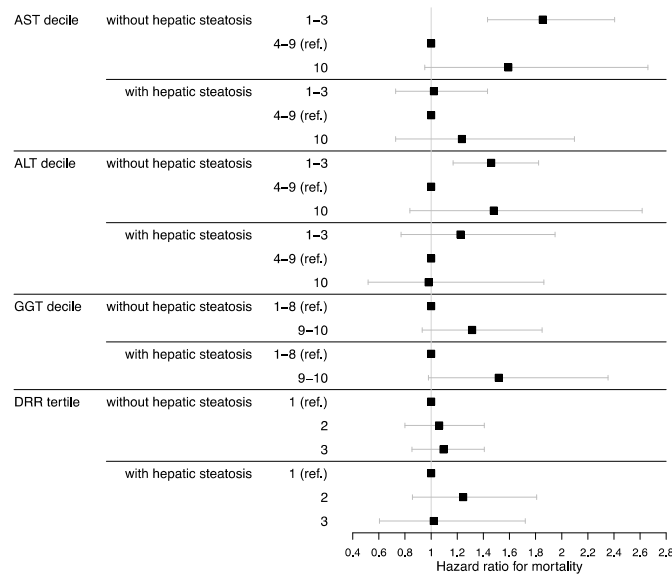

(c)

**Supplementary Figure S1.** Multivariate-adjusted hazard ratios with 95% confidence intervals for (a) all-cause, (b) heart disease, and (c) cancer mortality by hepatic steatosis and liver enzyme decile or DRR tertile after excluding participants taking certain medications that may cause hepatic steatosis (N=11,375 in analysis samples for AST, ALT, and DRR; N=8,871 in analysis sample for GGT) of the National Health and Nutrition Examination Survey III (1988-1994), United States. Abbreviations: AST = aspartate aminotransferase, ALT = alanine aminotransferase, GGT = gamma glutamyltransferase, DRR = De Ritis ratio. AST cut-points were 18 and 34 U/L for men and 16 and 27 U/L for women. ALT cut-points were 13 and 36 U/L for men and 9 and 24 U/L for women. GGT cut-points were 46 U/L for men and 31 U/L for women. DRR cut-points were 1.2 and 1.64. Hazard ratios were estimated using Cox proportional hazard regression analysis and adjusted for age, sex, race/ethnicity, education, alcohol consumption, cigarette smoking, leisure-time physical activity, body mass index, diabetes, hypertension, high-density lipoprotein, total cholesterol, and triglycerides.
